# Supplementary material
Source: MDPI journal article supplement (https://www.mdpi.com/2571-5577/4/1/19)
Supplement: s1 [file s1]

# Supplementary Materials: Hydrothermal Carbonization of Lemon Peel Waste: Preliminary Results on the Effects of Temperature During Process Water Recirculation

Antonio Picone<sup>1</sup>, Maurizio Volpe<sup>1</sup>, Maria Gabriella Giustra<sup>1</sup>, Gaetano Di Bella<sup>1</sup> and Antonio Messineo<sup>1,\*</sup>

<sup>1</sup> Faculty of Engineering and Architecture, University of Enna Kore, Cittadella Universitaria, 94100 Enna, Italy;

\* Correspondence: [antonio.messineo@unikore.it](mailto:antonio.messineo@unikore.it)

**Citation:** Picone, A.; Volpe, M.; Giustra, M.G.; Di Bella, G.; Messineo, A. Hydrothermal Carbonization of Lemon Peel Waste: Preliminary Results on the Effects of Temperature During Process Water Recirculation. *Appl. Syst. Innov.* **2021**, *4*, x.  
<http://doi.org/10.3390/asi4010019>

Received date: 28 January 2021

Accepted date: 26 February 2021

Published date: 3 March 2021

**Publisher's Note:** MDPI stays neutral with regard to jurisdictional claims in published maps and institutional affiliations.

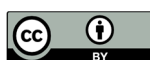

**Copyright:** © 2021 by the authors. Submitted for possible open access publication under the terms and conditions of the Creative Commons Attribution (CC BY) license (<http://creativecommons.org/licenses/by/4.0/>).

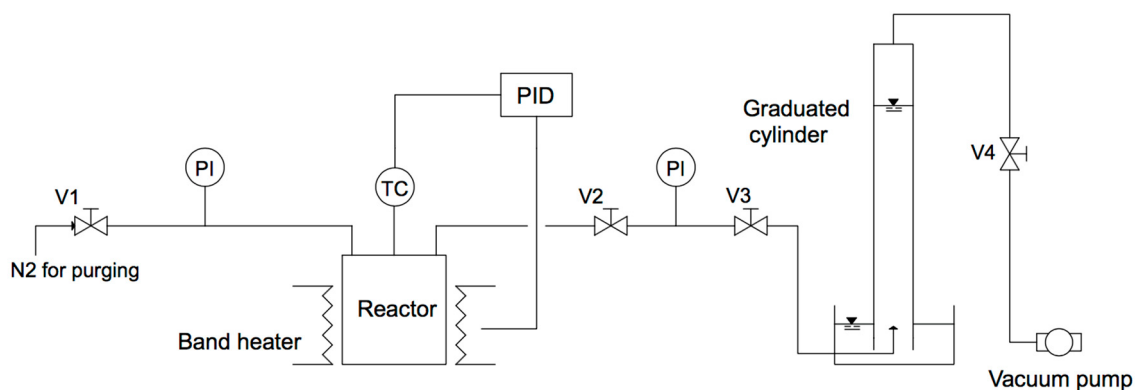

**Figure 1.** Piping and Instrumentation diagram (P&Id) of the HTC experimental system (TC= thermocouple; PI= pressure gauge; PID=temperature controller).

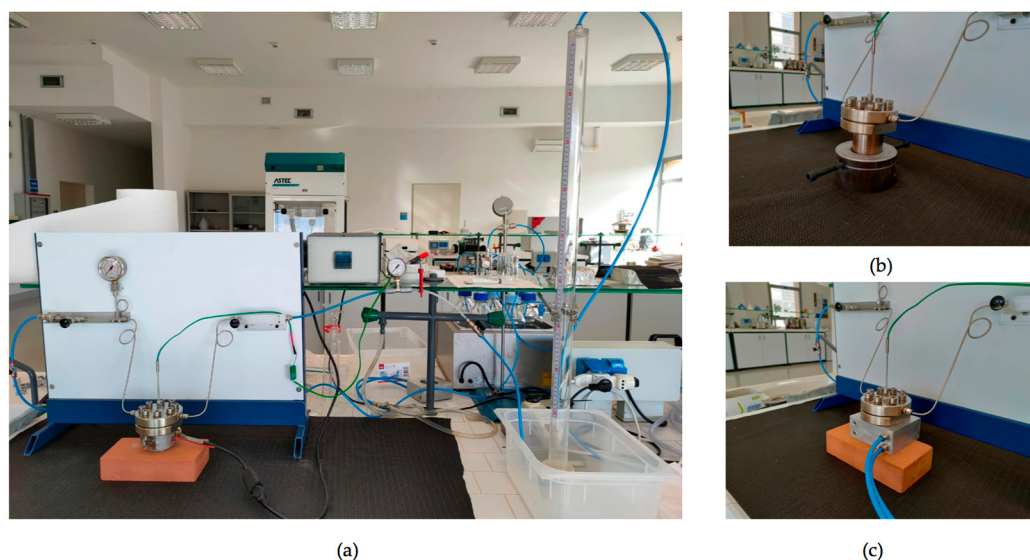

**Figure 2.** HTC apparatus: (a) HTC system during heating phase; (b) HTC reactor cooled down through a massive stainless steel disc at -10 °C; (c) HTC reactor cooled down through a stainless steel radiator with flowing tap water.

**Table 1.** Mass yields (dry basis) and process water characterization (Er% with three replications).

| Sample | Mass Yields wt% d.b. |                     |             | Process water |               |
|--------|----------------------|---------------------|-------------|---------------|---------------|
|        | Solid                | Liquid <sup>1</sup> | Gas         | pH            | TOC (g/L)     |
| 180_R0 | 50.1 ± 0.4%          | 43.7%               | 6.2 ± 0.5%  | 3.87 ± 0.41%  | 16.06 ± 0.54% |
| 220_R0 | 49.2 ± 0.4%          | 40.7%               | 10.1 ± 2.3% | 4.40 ± 0.22%  | 13.30 ± 0.51% |
| 250_R0 | 40.9 ± 0.7%          | 44.4%               | 14.7 ± 0.9% | 4.66 ± 0.34%  | 9.70 ± 0.42%  |
| 180_R1 | 55.9 ± 1.0%          | 37.6%               | 6.5 ± 0.5%  | 3.95 ± 0.21%  | 18.82 ± 0.54% |
| 220_R1 | 51.2 ± 1.0%          | 37.6%               | 11.2 ± 1.4% | 4.49 ± 0.21%  | 16.92 ± 0.51% |
| 250_R1 | 41.9 ± 0.7%          | 43.4%               | 14.8 ± 2.2% | 4.69 ± 0.32%  | 14.25 ± 0.43% |
| 180_R2 | 55.0 ± 1.5%          | 38.1%               | 6.9 ± 0.5%  | 3.97 ± 0.33%  | 20.08 ± 0.51% |
| 220_R2 | 49.9 ± 0.2%          | 38.7%               | 11.3 ± 1.0% | 4.50 ± 0.23%  | 17.79 ± 0.33% |
| 250_R2 | 42.5 ± 0.1%          | 42.8%               | 14.7 ± 1.9% | 4.70 ± 0.12%  | 18.06 ± 0.11% |

<sup>1</sup> Computed by difference.

**Table 2.** Proximate analysis and energy properties of raw LP and hydrochars (Er% with two replications).

| Sample | Proximate Analysis wt% d.b. |            |                 | Energy properties          |         |        |
|--------|-----------------------------|------------|-----------------|----------------------------|---------|--------|
|        | VM                          | Ash        | FC <sup>1</sup> | HHV (MJ kg <sup>-1</sup> ) | EDR (%) | EY (%) |
| Raw LP | 75.0 ± 0.2%                 | 3.8 ± 0.1% | 21.2 ± 0.8%     | 17.1 ± 0.5%                | 100.0   | 100.0  |
| 180_R0 | 65.3 ± 0.7%                 | 2.3 ± 2.9% | 32.4 ± 1.6%     | 22.4 ± 0.3%                | 130.8   | 65.5   |
| 220_R0 | 58.1 ± 0.6%                 | 3.1 ± 2.2% | 38.8 ± 0.7%     | 24.4 ± 0.9%                | 143.0   | 70.4   |
| 250_R0 | 50.5 ± 0.8%                 | 3.2 ± 0.1% | 46.3 ± 0.9%     | 26.7 ± 0.4%                | 156.0   | 63.7   |
| 180_R1 | 63.6 ± 0.4%                 | 3.0 ± 0.6% | 33.4 ± 0.7%     | 22.0 ± 0.1%                | 128.9   | 72.0   |
| 220_R1 | 59.1 ± 0.7%                 | 3.7 ± 1.6% | 37.1 ± 1.3%     | 23.9 ± 0.3%                | 139.9   | 71.7   |
| 250_R1 | 51.6 ± 0.1%                 | 3.2 ± 0.2% | 45.2 ± 0.1%     | 26.8 ± 0.2%                | 156.9   | 65.7   |
| 180_R2 | 62.6 ± 0.3%                 | 3.0 ± 0.5% | 34.4 ± 0.7%     | 22.2 ± 0.8%                | 129.9   | 71.5   |
| 220_R2 | 58.1 ± 0.1%                 | 3.2 ± 0.4% | 38.7 ± 0.2%     | 24.7 ± 0.3%                | 144.6   | 72.2   |
| 250_R2 | 51.7 ± 0.5%                 | 3.3 ± 0.3% | 45.1 ± 0.6%     | 27.2 ± 0.3%                | 159.3   | 67.7   |

<sup>1</sup> Computed by difference.
